# Supplementary material for: A theoretical study on the surface reaction of tetrakis(dimethylamino)titanium on titanium oxide
Source: Royal Society of Chemistry journal article supplement (doi:10.1039/d3cp02009f), 2023-01-01
Supplement: d3cp02009f1.pdf [file d3cp02009f1.pdf]

## **Supplementary information**

# **Theoretical Study on the Surface Reaction of Tetrakis(dimethylamino)titanium on Titanium Oxide**

Hye-Lee Kim,<sup>a†</sup> Romel Hidayat,<sup>b†</sup> Khabib Khumaini,<sup>b,c</sup> and Won-Jun Lee<sup>a,b,\*</sup>

<sup>a</sup> Metal-organic Compounds Materials Research Center, Sejong University, Seoul, 05006, Republic of Korea. E-mail: [wjlee@sejong.ac.kr](mailto:wjlee@sejong.ac.kr)

<sup>b</sup> Departments of Nanotechnology and Advanced Materials Engineering, Sejong University, Seoul, 05006, Republic of Korea.

<sup>c</sup> Department of Chemistry, Universitas Pertamina, Jakarta 12220, Indonesia.

† H.-L. Kim and R. Hidayat are equally-contributed first authors.

\*Electronic mail: [wjlee@sejong.ac.kr](mailto:wjlee@sejong.ac.kr)

## The energy of H<sub>2</sub>O formation from surface hydroxyl groups

The energy of H<sub>2</sub>O formation from surface hydroxyl groups ( $E_{H_2O\text{ formation}}$ ) was calculated using the following equation:

$$E_{H_2O\text{ formation}} = E_{\text{after } H_2O\text{ formation}} - E_{\text{before } H_2O\text{ formation}} \quad (1)$$

where  $E_{\text{after } H_2O\text{ formation}}$  is the total energy after the OH and H groups on the surface combine to form an H<sub>2</sub>O molecule, and  $E_{\text{before } H_2O\text{ formation}}$  is the total energy of the initial surface.

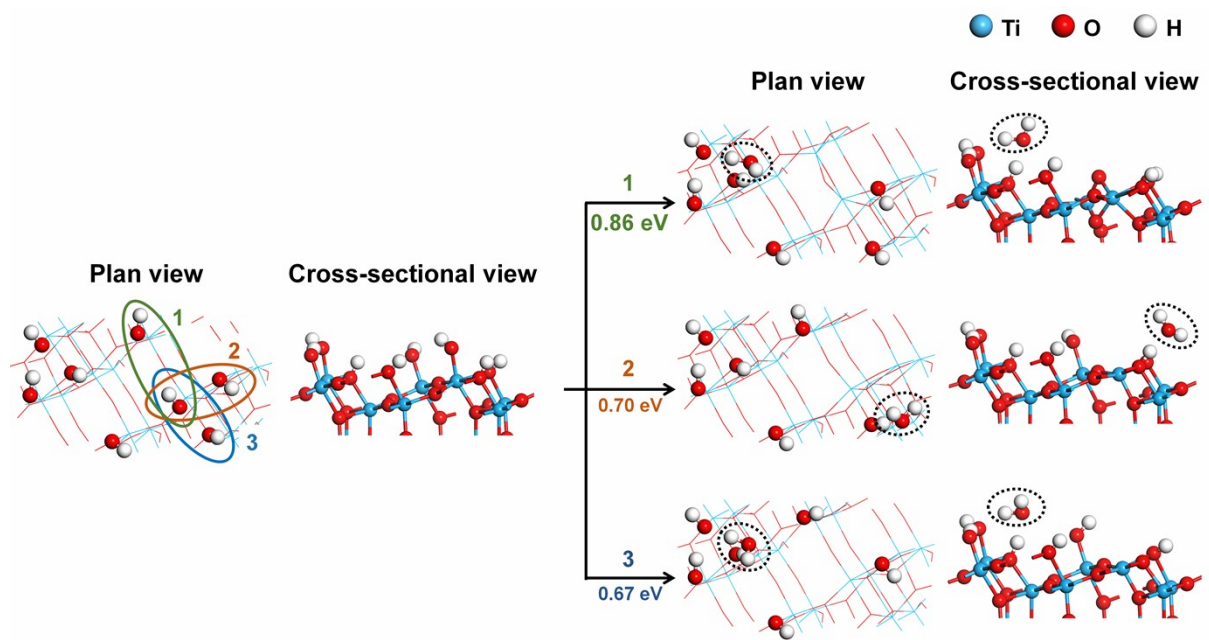

Fig. S1 The energy of H<sub>2</sub>O formation from surface hydroxyl groups.

## Temperature-dependent free energy change for the desorption of H<sub>2</sub>O

We considered the formation of the H<sub>2</sub>O from the structure (3) at an elevated temperature in Fig. S1. We then calculated the free energy of the initial substrate, the substrate after H<sub>2</sub>O release, and the H<sub>2</sub>O molecule at a given temperature using DFT.<sup>1</sup> The pressure of H<sub>2</sub>O was assumed to be 1 Torr. The change in Gibbs free energy ( $\Delta G_T$ ) was determined by the following equation:

$$\Delta G_T = G_{T \text{ substrate after H}_2\text{O release}} + G_{T \text{ H}_2\text{O}} - G_{T \text{ initial substrate}} \quad (2)$$

The temperature-dependent change in free energy for releasing an H<sub>2</sub>O molecule is shown in Fig. S2. The release of H<sub>2</sub>O from the OH-passivated surface was expected to be spontaneous at 298°C or higher temperatures. Therefore, we concluded that it was unlikely that more water molecules would be released at the ALD process temperature compared to 0K.

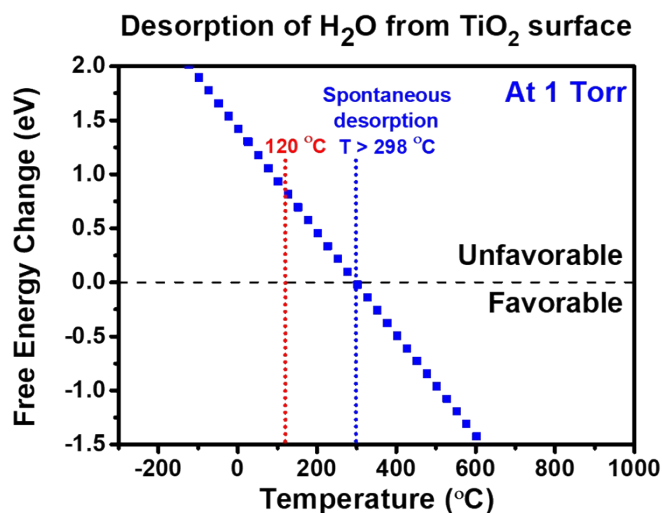

Fig. S2 The temperature-dependent free energy change for the desorption of an H<sub>2</sub>O molecule at 1 Torr.

## Slab thickness convergence

Surface energy ( $E_{surf}$ ) of the hydroxylated surface slab model was calculated using the following equation:<sup>2</sup>

$$E_{surf} = \frac{(E_{slab} - nE_{bulk} - mE_{H2O})}{2A} \quad (3)$$

where the  $E_{slab}$  and  $E_{bulk}$  are the total energies of the bare slab and the bulk of  $TiO_2$ , and  $m$  is the number of  $H_2O$  required to form the hydroxyl groups. The surface energy of hydroxylated  $TiO_2$  almost converges at the two Ti layers, as shown in Fig. S3.

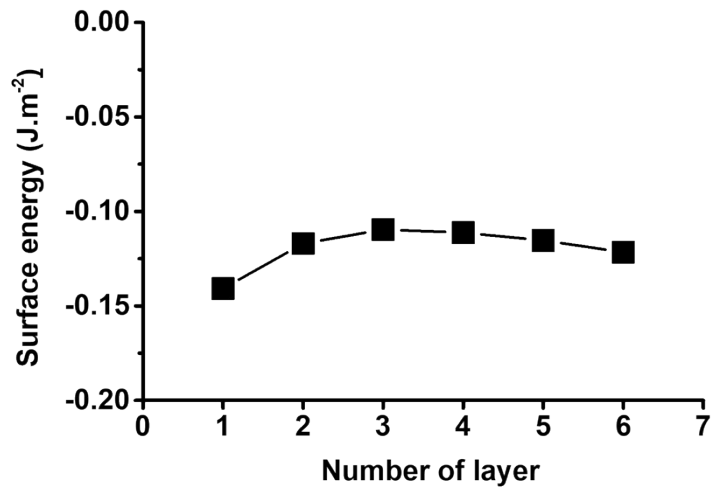

Fig. S3 The surface energy convergence on various layer thicknesses of the hydroxylated  $TiO_2$  slab.

Adsorption energies ( $E_{ads}$ ) of a TDMAT molecule on the optimized hydroxylated  $TiO_2$  surface with various numbers of layers were calculated using the following equation:

$$E_{ads} = E_{phys} - (E_{slab} - E_{TDMAT}) \quad (4)$$

where the  $E_{phys}$  and  $E_{TDMAT}$  are the total energies of physisorbed TDMAT on the surface and a TDMAT molecule. The adsorption energies of TDMAT molecules converge at three Ti layers but almost converge at two Ti layers, as shown in Fig. S4.

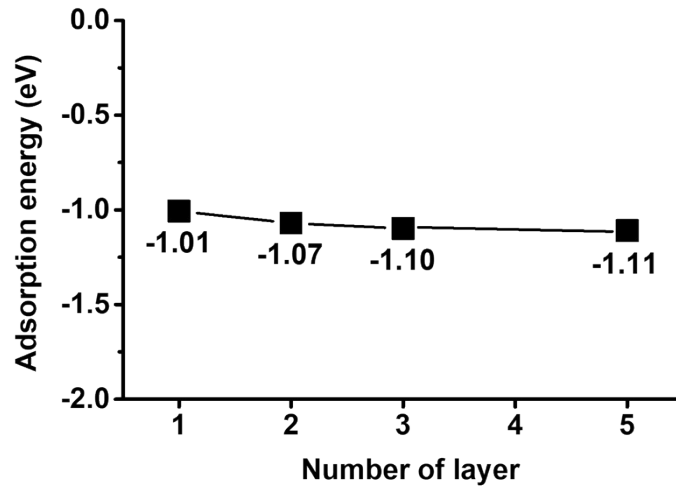

Fig. S4 The adsorption energy of a TDMAT molecule on various layer thicknesses of the hydroxylated  $TiO_2$  surface. The bottom half layer was fixed.

## References

- 1 S. Kim, R. Hidayat, H. Roh, J. Kim, H.-L. Kim, K. Khumaini, M. Park, J.-H. Seok, J. W. Park and W.-J. Lee, *J. Mater. Chem. C*, 2022, **10**, 6696–6709.
- 2 C. J. Lombard, C. G. C. E. van Sittert, J. N. Mugo, C. Perry and D. J. Willock, *Phys. Chem. Chem. Phys.*, 2023, **25**, 6121–6130.
